# Supplementary material
Source: MDPI journal article supplement (https://www.mdpi.com/2077-0472/11/11/1036)
Supplement: s1 [file s1]

## Supplementary Materials:

**Table S1. Strains and sequence accession numbers in this study**

| Species                      | Strains                 | GenBank accession No. |                  |                 |                 |
|------------------------------|-------------------------|-----------------------|------------------|-----------------|-----------------|
|                              |                         | ITS                   | $\beta$ -tubulin | RPB2            | CaM             |
| <i>Aspergillus aculeatus</i> | CBS172.66               | FJ629320              | HE577806         | JN121448        | FN594542        |
| <i>A. aculeatinus</i>        | CBS121060               | MH863102              | EU159220         | HF559233        | EU159241        |
| <i>A. amoenus</i>            | NRRL4838                | EF652480              | JN853946         | JN853824        | JN854035        |
| <i>A. austroafricanus</i>    | NRRL233                 | JQ301891              | JN853963         | JN853814        | JN854025        |
| <i>A. baeticus</i>           | CCF4226                 | HE615086              | HE615092         | HE615124        | HE615117        |
| <i>A. brevijanans</i>        | NRRL1935                | EF669582              | EU014078         | EF669624        | EF669540        |
| <i>A. brunneoviolaceus</i>   | PW4049 =<br>CMV011A2    | LC567897              | MK451181         | MK450776        | MK451327        |
| <i>A. brunneoviolaceus</i>   | PW4122 =<br>CMV011A3    | LC519916              | MK451182         | MK450777        | MK451328        |
| <i>A. brunneoviolaceus</i>   | NRRL4912                | EF661220              | EF661105         | EF661045        | EF661147        |
| <i>A. brunneoviolaceus</i>   | <b>HZ10</b>             | <b>MZ168683</b>       | <b>MZ168684</b>  | <b>MZ168682</b> | <b>MZ168681</b> |
| <i>A. brunneoviolaceus</i>   | <b>HZ23</b>             | <b>MZ168687</b>       | <b>MZ168685</b>  | <b>MZ168688</b> | <b>MZ168686</b> |
| <i>A. campestris</i>         | NRRL13001               | EF669577              | EU014091         | EF669619        | EF669535        |
| <i>A. candidus</i>           | NRRL303                 | EF669592              | EU014089         | EF669634        | EF669550        |
| <i>A. capensis</i>           | DTO179E6                | KJ775550              | KJ775072         | KP987020        | KJ775279        |
| <i>A. creber</i>             | NRRL58592               | JQ301889              | JN853980         | JN853832        | JN854043        |
| <i>A. cyjetkovicii</i>       | NRRL227                 | EF652440              | EF652264         | EF652176        | EF652352        |
| <i>A. flavipes</i>           | NRRL302                 | EF669591              | EU014085         | EF669633        | EF669549        |
| <i>A. floridensis</i>        | ITEM14783 =<br>DTO198A8 | MN431366              | HE984412         | HE984376        | HE984429        |
| <i>A. fructus</i>            | NRRL239                 | EF652449              | EF652273         | EF652185        | EF652361        |
| <i>A. fruticosus</i>         | NRRL4903                | EF652483              | EF652307         | EF652219        | EF652395        |
| <i>A. heterothallicus</i>    | NRRL5096                | EF652499              | EF652323         | EF652235        | EF652411        |
| <i>A. iizukaelo</i>          | NRRL3750                | EF669597              | EU014086         | EF669639        | EF669555        |
| <i>A. iizukaelo</i>          | NRRL35046               | EF669596              | EU014087         | EF669638        | EF669554        |
| <i>A. janus</i>              | NRRL1787                | EF669578              | EU014076         | EF669620        | EF669536        |
| <i>A. jensenii</i>           | NRRL58600               | JQ301892              | JN854007         | JN853835        | JN854046        |
| <i>A. luppii</i>             | NRRL6326 =<br>CBS653.74 | EF669617              | EU014079         | JN121545        | EF669575        |
| <i>A. niveoglaucus</i>       | CBS101750               | HE615135              | HE801331         | HE801312        | HE801323        |
| <i>A. protuberus</i>         | NRRL3505                | EF652460              | EF652284         | EF652196        | EF652372        |
| <i>A. puniceus</i>           | NRRL5077                | EF652498              | EF652322         | EF652234        | EF652410        |
| <i>A. puniceus</i>           | NRRL1852                | EF652425              | EF652249         | EF652161        | EF652337        |
| <i>A. puniceus</i>           | NRRL4688                | EF652469              | EF652293         | EF652205        | EF652381        |
| <i>A. puulaauensis</i>       | NRRL35641               | JQ301893              | JN853979         | JN853823        | JN854034        |
| <i>A. saccharolyticus</i>    | CBS127449               | HM853552              | HM853553         | HF559235        | HM853554        |
| <i>A. subalbidus</i>         | NRRL5214                | LT908114              | LT908034         | LT908036        | LT908035        |
| <i>A. subversicolor</i>      | NRRL58999               | JQ301894              | JN853970         | JN853799        | JN854010        |
| <i>A. sydowii</i>            | NRRL250                 | EF652450              | EF652274         | EF652186        | EF652362        |
| <i>A. tabacinus</i>          | NRRL4791                | EF652478              | EF652302         | EF652214        | EF652390        |

|                              |                          |                 |                 |                 |                 |
|------------------------------|--------------------------|-----------------|-----------------|-----------------|-----------------|
| <i>A. tennesseensis</i>      | NRRL13150                | JQ301895        | JN853976        | JN853806        | JN854017        |
| <i>A. trinidadensis</i>      | ITEM14821 =<br>DTO198D1  | MN431380        | HE984420        | HE984379        | HE984434        |
| <i>A. tritici</i>            | CBS266.81                | MN431381        | MN969368        | MN969098        | MN969233        |
| <i>A. tubingensis</i>        | NRRL62644                | KC796398        | KC796370        | KC796437        | KC796386        |
| <i>A. tubingensis</i>        | NRRL62643                | KC796397        | KC796369        | KC796436        | KC796385        |
| <i>A. tubingensis</i>        | NRRL62639                | KC796393        | KC796365        | KC796432        | KC796381        |
| <i>A. tubingensis</i>        | NRRL4866                 | KC796387        | KC796363        | KC796422        | KC796379        |
| <b><i>A. tubingensis</i></b> | <b>HZ123</b>             | <b>MZ168696</b> | <b>MZ168693</b> | <b>MZ168695</b> | <b>MZ168694</b> |
| <i>A. ustus</i>              | NRRL4991                 | EF652492        | EF652316        | EF652228        | EF652404        |
| <i>A. ustus</i>              | NRRL275                  | EF652455        | EF652279        | EF652191        | EF652367        |
| <i>A. venenatus</i>          | NRRL13147                | JQ301896        | JN854003        | JN853803        | JN854014        |
| <i>A. versicolor</i>         | NRRL238                  | EF652442        | EF652266        | EF652178        | EF652354        |
| <i>A. violaceofuscus</i>     | CBS102.23 =<br>CBS123.17 | MH854737        | HE577805        | HF559234        | FJ491698        |
| <i>Penicillium alfredii</i>  | DTO269A4                 | KJ775684        | KJ775177        | KJ834520        | KJ775411        |
| <i>P. brefeldianum</i>       | NRRL710                  | AF033435        | EU021669        | EU021658        | EU021683        |
| <i>P. chermesinum</i>        | CBS231.81 =<br>NRRL2048  | AY74269<br>3    | KJ834441        | MN969111        | AY741728        |
| <i>P. cinnamopurpureum</i>   | NRRL162 =<br>CBS847.68   | EF626950        | EF626948        | JN406533        | EF626949        |
| <i>P. ellipsoideosporum</i>  | CBS112493 =<br>AS3.5688  | JX012224        | JQ965104        | JN121427        | AY678559        |
| <i>P. idahoense</i>          | NRRL5274 =<br>CBS341.68  | EF626955        | EF626953        | JN121499        | EF626954        |
| <i>P. incoloratum</i>        | CBS101753                | KJ834508        | KJ834457        | JN406651        | KJ866984        |
| <i>P. infrapurpureum</i>     | CBS138219 =<br>DTO235F6  | KJ775679        | KJ775172        | MN969120        | KJ775406        |
| <i>P. jamesonlandense</i>    | IBT21985                 | KY989164        | KY989039        | KY989214        | KY989101        |
| <i>P. janthinellum</i>       | CBS340.48                | GU981585        | GU981625        | GU981625        | MN969268        |
| <i>P. javanicum</i>          | CBS341.48                | GU981613        | GU981657        | JN121498        | MN969269        |
| <i>P. kojigenum</i>          | CBS345.61 =<br>NRRL3442  | AF033489        | KJ834463        | JN406564        | KJ867011        |
| <i>P. lanosum</i>            | CBS106.11 =<br>NRRL2009  | MH854599        | DQ285627        | JN121420        | FJ530974        |
| <i>P. malacaense</i>         | NRRL35754                | EU427300        | EU427268        | EU427261        | KF932944        |
| <i>P. nodulum</i>            | CBS227.89                | KC411703        | KJ834475        | JN406603        | KJ867003        |
| <i>P. oxalicum</i>           | CBS219.30                | MH855125        | KF296462        | JN121456        | MN969283        |
| <i>P. oxalicum</i>           | CV822                    | JX091431        | JX091528        | KF296448        | JX141543        |
| <i>P. oxalicum</i>           | 5648=<br>ITEM7573        | KJ527449        | KJ527414        | KJ527379        | AY678546        |
| <b><i>P. oxalicum</i></b>    | <b>HZ06</b>              | <b>MZ168691</b> | <b>MZ168689</b> | <b>MZ168692</b> | <b>MZ168690</b> |
| <i>P. parvulum</i>           | CBS132825=<br>NRRL35504  | EF422845        | EF506218        | MN969131        | EF506225        |
| <i>P. penarojense</i>        | CBS113178                | GU981570        | GU981646        | KF296450        | MN969287        |
| <i>P. piscarium</i>          | CBS362.48                | GU981600        | GU981668        | KF296451        | MN969288        |

|                             |                              |          |          |          |          |
|-----------------------------|------------------------------|----------|----------|----------|----------|
| <i>P. raistrickii</i>       | CBS261.33                    | JN617697 | KJ834485 | JN606589 | KJ867006 |
| <i>P. ribeum</i>            | CBS127809                    | MH864716 | MN969395 | JN406631 | KJ866995 |
| <i>P. sajarovii</i>         | CBS277.83                    | KC411724 | MN969397 | JN406588 | KJ867007 |
| <i>P. scabrosum</i>         | CBS683.89=<br>DAOM21478<br>6 | DQ267906 | DQ285610 | JN406541 | FJ530987 |
| <i>P. shennangjianum</i>    | CBS228.89=<br>AS3.4526       | MH862167 | KJ834491 | JN121458 | AY678561 |
| <i>P. skrjabinii</i>        | CBS439.75=<br>NRRL13055      | MH860934 | GU981626 | EU427252 | MN969299 |
| <i>P. soppii</i>            | CBS226.28                    | MH854995 | MN969399 | JN406606 | KJ867002 |
| <i>P. swiecickii</i>        | CBS119391=<br>NRRL918        | AF033490 | KJ834494 | JN406635 | KJ866993 |
| <i>P. vanderhammenii</i>    | CBS126216                    | MH863982 | GU981647 | KF296458 | MN969308 |
| <i>P. virgatum</i>          | CBS114838                    | AJ748692 | KJ834500 | JN406641 | KJ866992 |
| <i>P. wotroi</i>            | CBS118171                    | GU981591 | GU981637 | KF296460 | MN969313 |
| <i>P. zonatum</i>           | CBS992.72                    | GU981581 | GU981651 | KF296461 | MN969315 |
| <i>Aspergillus robustus</i> | NRRL6362                     | EF661176 | EU014101 | EF661033 | EF661127 |
| <i>Talaromyces flavus</i>   | CBS310.38                    | MH867464 | JX494302 | JF417426 | KF741949 |

---
